# Supplementary material for: Immunomodulatory Effect of Vitamin C on Proinflammatory Cytokines Production in Ossimi Lambs (Ovis aries) with Pneumonic Pasteurellosis
Source: MDPI journal article supplement (doi:10.3390/ani11123374), 2021-11-25
Supplement: s1 [file s1]

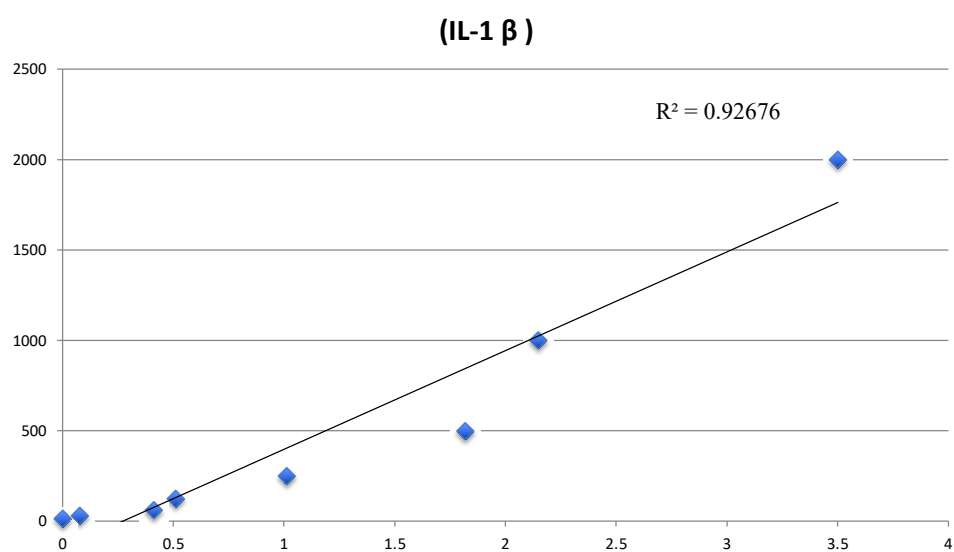

Figure S1. Standard cytokine curve for interleukin 1  $\beta$  (IL-1  $\beta$ )

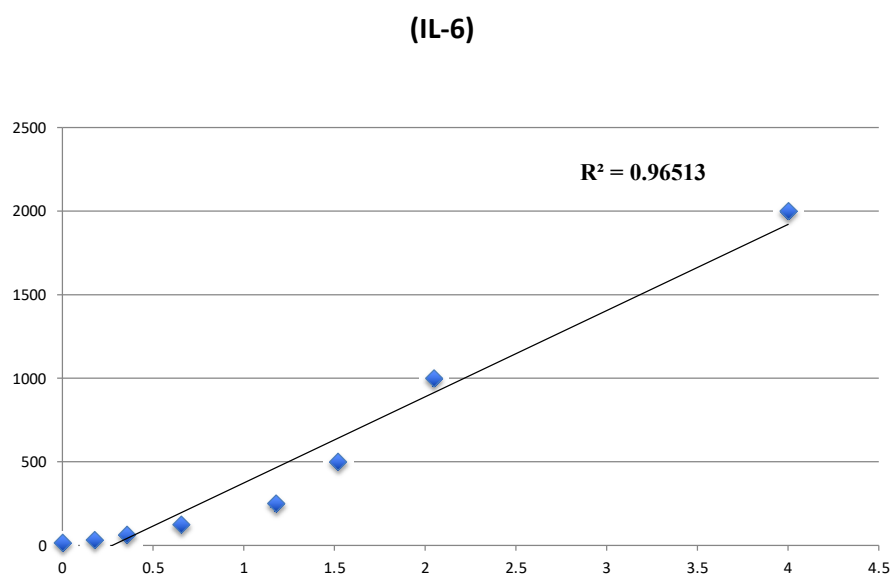

Figure S2. Standard cytokine curve for interleukin 6 (IL-6)

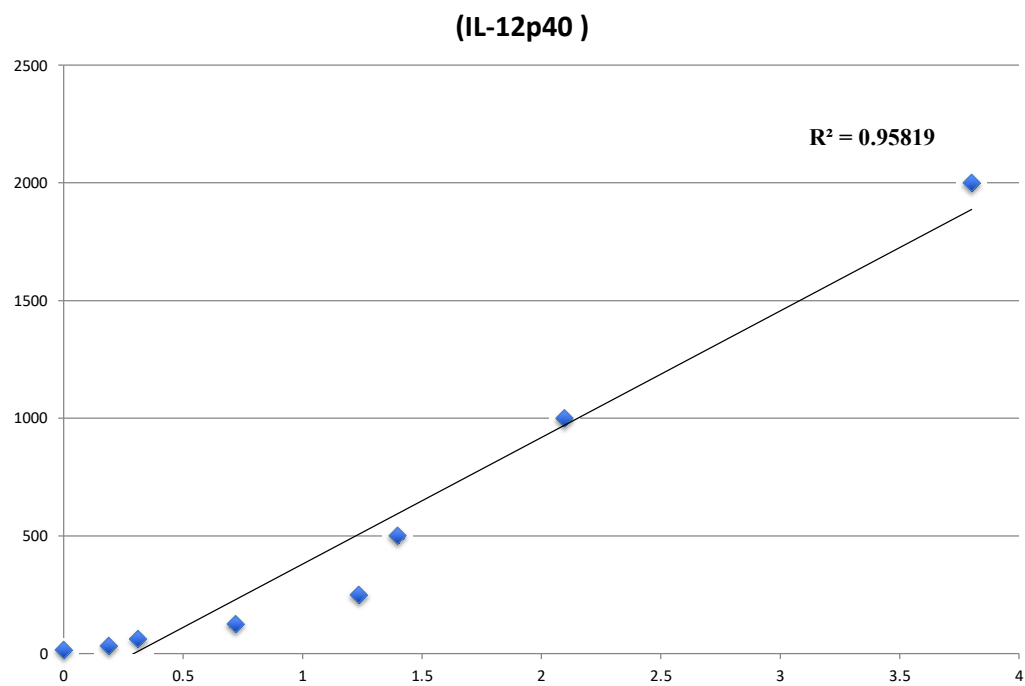

Figure S3. Standard cytokine curve for interleukin 12p40 (IL-12p40)

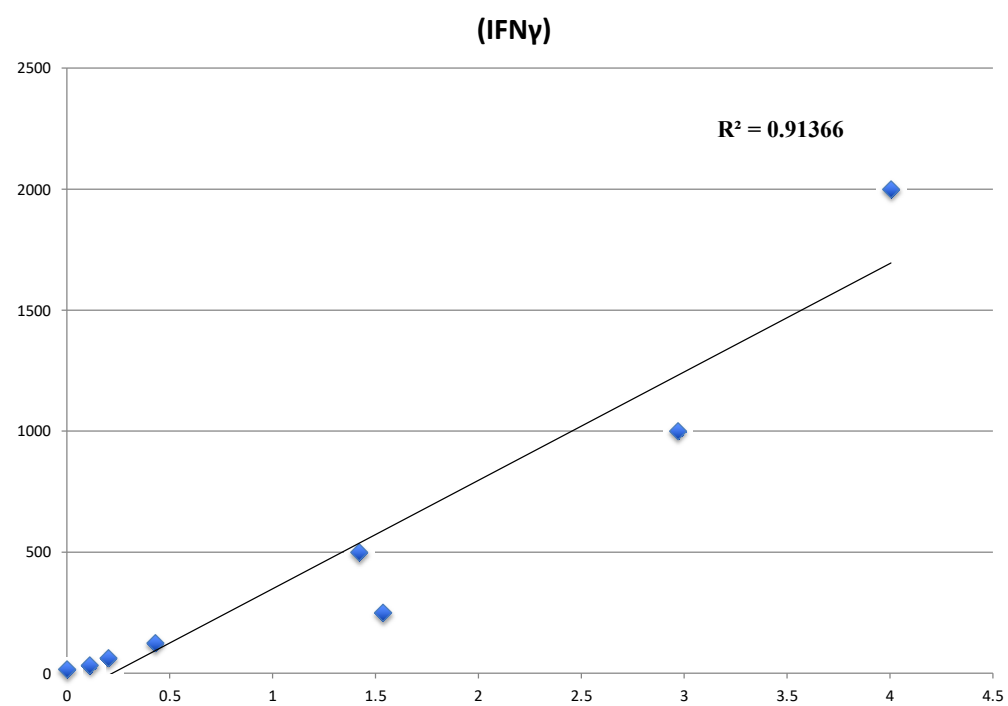

Figure S4. Standard cytokine curve for interferon gamma (IFN $\gamma$ )

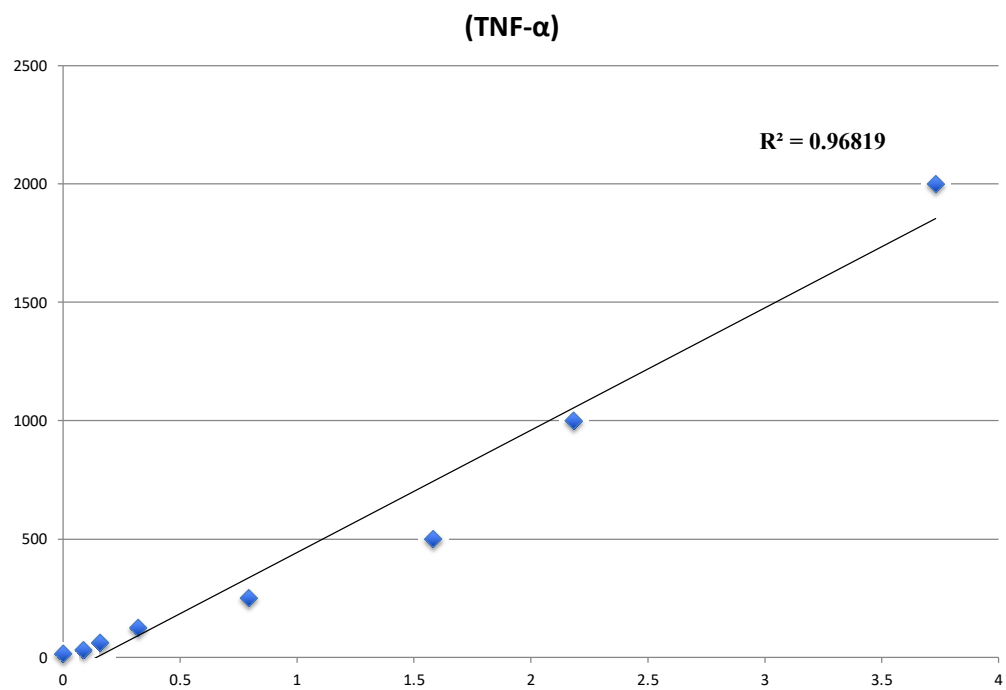

Figure S5. Standard cytokine curve for tumor necrosis factor alpha (TNF- $\alpha$ )

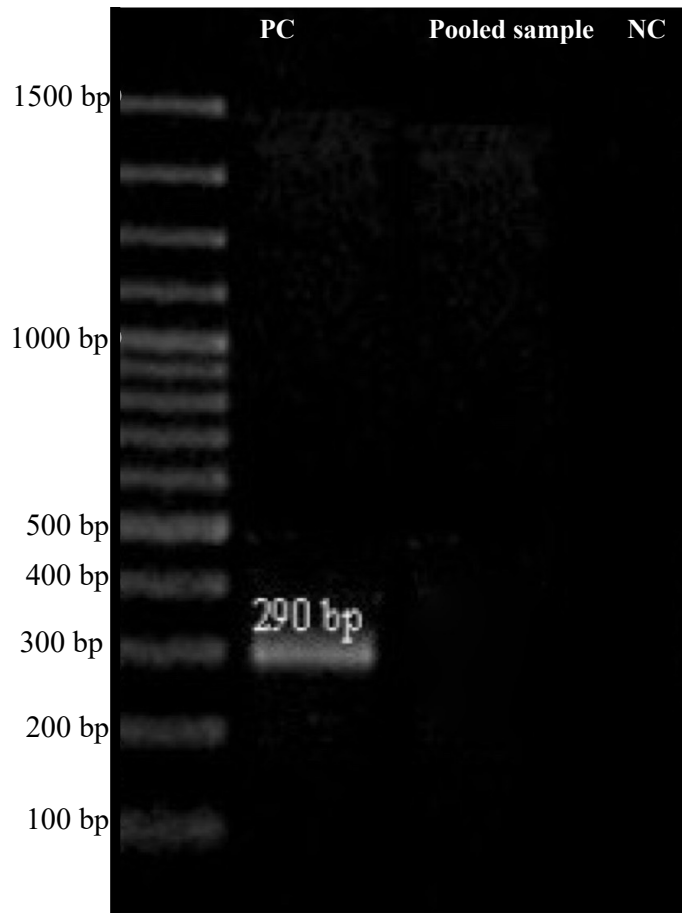

Figure S6. RT-PCR product visualized after agarose gel electrophoresis. The expected size of the PCR products was 290 bp. PC, Positive control sample, NC, Negative control, M= 100 bp ladder. RT-PCR was used to confirm the infection by BVD in the pooled buffy coat samples collected from the selected lambs. Cytopathic strain of BVDV genotype-2 (Strain 125) were obtained from the department of Rinderpest like Diseases, Veterinary Serum and Vaccine Research Institute, Cairo and used as a control strain for RT-PCR test. Pure RNA was extracted using viral RNA Purification Kit following the manufacturer protocol. PCR cycling conditions were performed using the following PCR primer sets: the forward primer (5'-ATGCCCTTAGTAGGACTAGCA-3')/reverse primer (5'- CAACTCCATGTGCCATGTACAGCAG -3').

Table S1. *P* values for the Pearson correlation test coefficient between clinical signs scores and the production of pro-inflammatory cytokines in lambs naturally infected with pneumonic pasteurellosis

| Variables    | CSS  | IL-1 $\beta$ | IL-6 | IL-12p40 | TNF- $\alpha$ | IFN $\gamma$ |
|--------------|------|--------------|------|----------|---------------|--------------|
| CSS          |      | 0.57         | 0.70 | 0.36     | 0.44          | 0.80         |
| IL-1 $\beta$ | 0.57 |              | 0.35 | 0.42     | 0.84          | 0.26         |
| IL-6         | 0.70 | 0.35         |      | 0.12     | 0.81          | 0.93         |

|                                |      |      |      |              |      |              |
|--------------------------------|------|------|------|--------------|------|--------------|
| <b>IL-12p40</b>                | 0.36 | 0.42 | 0.12 |              | 0.09 | <b>0.004</b> |
| <b>TNF-<math>\alpha</math></b> | 0.44 | 0.84 | 0.81 | 0.09         |      | 0.09         |
| <b>IFN<math>\gamma</math></b>  | 0.80 | 0.26 | 0.93 | <b>0.004</b> | 0.09 |              |

Abbreviations: CSS (clinical signs score), interleukin 1  $\beta$  (IL-1  $\beta$ ), interleukin 6 (IL-6), interleukin 12p40 (IL-12p40), interferon gamma (IFN $\gamma$ ) and tumor necrosis factor alpha (TNF- $\alpha$ ). Differences between means at  $P < 0.05$  were considered significant.

Table S2.  $P$  values for the Pearson correlation test coefficient between responses to the treatment by tulathromycin in lambs naturally infected with pneumonic pasteurellosis

| <b>Variables</b>               | <b>CSS</b>   | <b>IL-1 <math>\beta</math></b> | <b>IL-6</b>  | <b>IL-12p40</b> | <b>TNF-<math>\alpha</math></b> | <b>IFN<math>\gamma</math></b> |
|--------------------------------|--------------|--------------------------------|--------------|-----------------|--------------------------------|-------------------------------|
| <b>CSS</b>                     |              | 0.25                           | <b>0.009</b> | 0.05            | 0.41                           | 0.63                          |
| <b>IL-1 <math>\beta</math></b> | 0.25         |                                | 0.06         | 0.64            | 0.13                           | <b>0.03</b>                   |
| <b>IL-6</b>                    | <b>0.009</b> | 0.06                           |              | 0.08            | 0.11                           | 0.55                          |
| <b>IL-12p40</b>                | 0.05         | 0.64                           | 0.08         |                 | 0.23                           | 0.93                          |
| <b>TNF-<math>\alpha</math></b> | 0.41         | 0.13                           | 0.11         | 0.23            |                                | 0.52                          |
| <b>IFN<math>\gamma</math></b>  | 0.63         | <b>0.03</b>                    | 0.55         | 0.92            | 0.52                           |                               |

Abbreviations: CSS (clinical signs score), interleukin 1  $\beta$  (IL-1  $\beta$ ), interleukin 6 (IL-6), interleukin 12p40 (IL-12p40), interferon gamma (IFN $\gamma$ ) and tumor necrosis factor alpha (TNF- $\alpha$ ). Differences between means at  $P < 0.05$  were considered significant.

Table S3.  $P$  values for the Pearson correlation test coefficient between responses to the treatment by tulathromycin combined with vitamin C in lambs naturally infected with pneumonic pasteurellosis

| <b>Variables</b> | <b>CSS</b> | <b>IL-1 <math>\beta</math></b> | <b>IL-6</b> | <b>IL-12p40</b> | <b>TNF-<math>\alpha</math></b> | <b>IFN<math>\gamma</math></b> |
|------------------|------------|--------------------------------|-------------|-----------------|--------------------------------|-------------------------------|
| <b>CSS</b>       |            | 0.55                           | 0.38        | 0.93            | 0.25                           | 0.44                          |

|                                |      |      |      |      |      |      |
|--------------------------------|------|------|------|------|------|------|
| <b>IL-1 <math>\beta</math></b> | 0.55 |      | 0.90 | 0.94 | 0.37 | 0.32 |
| <b>IL-6</b>                    | 0.38 | 0.90 |      | 0.34 | 0.17 | 0.61 |
| <b>IL-12p40</b>                | 0.93 | 0.94 | 0.34 |      | 0.46 | 0.95 |
| <b>TNF-<math>\alpha</math></b> | 0.25 | 0.37 | 0.17 | 0.46 |      | 0.38 |
| <b>IFN<math>\gamma</math></b>  | 0.44 | 0.32 | 0.61 | 0.95 | 0.38 |      |

Abbreviations: CSS (clinical signs score), interleukin 1  $\beta$  (IL-1  $\beta$ ), interleukin 6 (IL-6), interleukin 12p40 (IL-12p40), interferon gamma (IFN $\gamma$ ) and tumor necrosis factor alpha (TNF- $\alpha$ ). Differences between means at  $P < 0.05$  were considered significant.
